# Supplementary material for: Evolution of Highly Pathogenic H5N1 Avian Influenza Viruses in Vietnam between 2001 and 2007
Source: PubMed Central journal article supplement (PMC2565130; doi:10.1371/journal.pone.0003462), 2008-10-21
Supplement: pone.0003462.s001.pdf [file pone.0003462.s001.pdf]

|      |                       |        |     |              |           |           |           |            |           |            |           |           |            |       |             |       |       |       |       |              |            |
|------|-----------------------|--------|-----|--------------|-----------|-----------|-----------|------------|-----------|------------|-----------|-----------|------------|-------|-------------|-------|-------|-------|-------|--------------|------------|
| 2003 | M.Dk/VN/NCVD2/03      | NCVD   |     | HA TAY       | ISDN40364 | ISDN40847 |           | ISDN49462  |           | ISDN48800  | ISDN39961 |           | F1(GX4016) | F1    |             | F1    |       | F1    |       | E319(GX4016) |            |
| 2003 | M.Dk/VN/NCVD20/03     | NCVD   |     | HA TAY       |           |           |           | ISDN40337  | ISDN41053 | ISDN48813  | ISDN39978 | ISDN40035 |            |       |             | HK821 | HK821 | HK821 | HK821 | HK821        | HK821      |
| 2003 | M.Dk/VN/NCVD21/03     | NCVD   | VN3 | HUNG YEN     | ISDN40371 | ISDN40853 | ISDN40942 | ISDN38691  | ISDN40082 | ISDN38700  | ISDN39979 | ISDN40036 | HK821      | HK821 | HK821       | HK821 | HK821 | HK821 | HK821 | HK821        | HK821      |
| 2003 | M.Dk/VN/NCVD23/03     | NCVD   |     | BAC NINH     | ISDN40372 |           |           | ISDN40915  | ISDN40083 | ISDN38709  | ISDN39980 | ISDN40037 | HK821      |       |             | HK821 | HK821 | HK821 | HK821 | HK821        | HK821      |
| 2003 | M.Dk/VN/NCVD28/03     | NCVD   | VN3 | HA TAY       | ISDN40374 | ISDN40855 | ISDN40941 | ISDN40913  | ISDN40084 | ISDN38701  | ISDN45806 | ISDN40038 | HK821      | HK821 | HK821       | HK821 | HK821 | HK821 | HK821 | HK821        | HK821      |
| 2003 | M.Dk/VN/NCVD9/03      | NCVD   |     | HA NOI       |           |           |           | ISDN40327  | ISDN40076 | ISDN48805  | ISDN39968 | ISDN40024 |            |       |             | F1    | F1    | F1    |       | E319(GX4016) | F1(GX4016) |
| 2004 | Ck/VN/G04/04          | Public |     |              |           |           |           | ISDN128306 |           | ISDN128352 |           |           |            |       |             | HK821 |       |       | HK821 |              |            |
| 2004 | Ck/VN/1/04            | Public |     |              |           |           |           | EF541409   |           | EF541475   | EF541449  |           |            |       |             | HK821 | HK821 | HK821 | HK821 |              | HK821      |
| 2004 | Ck/VN/132/04          | Public | VN3 | VINH LONG    | DQ492892  | DQ493417  | DQ493331  | DQ497718   | DQ493155  | DQ493067   | DQ492979  | DQ493243  | HK821      | HK821 | HK821       | HK821 | HK821 | HK821 | HK821 | HK821        | HK821      |
| 2004 | Ck/VN/133/04          | Public | VN3 | CAN THO      | DQ492875  | DQ493399  | DQ493313  | DQ497700   | DQ493138  | DQ493049   | DQ492961  | DQ493225  | HK821      | HK821 | HK821       | HK821 | HK821 | HK821 | HK821 | HK821        | HK821      |
| 2004 | Ck/VN/134/04          | Public |     | TIEN GIANG   | DQ492889  | DQ493413  | DQ493327  | DQ497714   | DQ493151  | DQ493063   | DQ492975  | DQ493239  | HK821      | HK821 | Not defined | HK821 | HK821 | HK821 | HK821 | HK821        | HK821      |
| 2004 | Ck/VN/135/04          | Public | VN3 | BAC LIEU     | DQ492871  | DQ493395  | DQ493308  | DQ497695   | DQ493133  | DQ493044   | DQ492956  | DQ493220  | HK821      | HK821 | HK821       | HK821 | HK821 | HK821 | HK821 | HK821        | HK821      |
| 2004 | Ck/VN/147/04          | Public | VN3 | CAN THO      | DQ492876  | DQ493400  | DQ493314  | DQ497701   | DQ493139  | DQ493050   | DQ492962  | DQ493226  | HK821      | HK821 | HK821       | HK821 | HK821 | HK821 | HK821 | HK821        | HK821      |
| 2004 | Ck/VN/149/04          | Public | VN3 | BAC LIEU     | DQ492872  | DQ493396  | DQ493309  | DQ497696   | DQ493134  | DQ493045   | DQ492957  | DQ493221  | HK821      | HK821 | HK821       | HK821 | HK821 | HK821 | HK821 | HK821        | HK821      |
| 2004 | Ck/VN/159/04          | Public | VN3 | SOC TRANG    | DQ492888  | DQ493412  | DQ493326  | DQ497713   | DQ493150  | DQ493062   | DQ492974  | DQ493238  | HK821      | HK821 | HK821       | HK821 | HK821 | HK821 | HK821 | HK821        | HK821      |
| 2004 | Ck/VN/260/04          | Public | VN3 | HAU GIANG    | DQ492881  | DQ493405  | DQ493319  | DQ497706   | DQ493144  | DQ493055   | DQ492967  | DQ493231  | HK821      | HK821 | HK821       | HK821 | HK821 | HK821 | HK821 | HK821        | HK821      |
| 2004 | Ck/VN/32/04           | Public | VN3 | THAI BINH    | DQ492863  | DQ493387  | DQ493300  | DQ497687   | DQ493125  | DQ493036   | DQ492948  | DQ493212  | HK821      | HK821 | HK821       | HK821 | HK821 | HK821 | HK821 | HK821        | HK821      |
| 2004 | Ck/VN/33/04           | Public | VN3 |              | AY651722  | AY651668  | AY651614  | AY651337   | AY651502  | AY651449   | AY651391  | AY651556  | HK821      | HK821 | HK821       | HK821 | HK821 | HK821 | HK821 | HK821        | HK821      |
| 2004 | Ck/VN/35/04           | Public | VN3 |              | AY651723  | AY651669  | AY651615  | AY651338   | AY651503  | AY651450   | AY651392  | AY651557  | HK821      | HK821 | HK821       | HK821 | HK821 | HK821 | HK821 | HK821        | HK821      |
| 2004 | Ck/VN/36/04           | Public | VN3 |              | AY651724  | AY651670  | AY651616  | AY651339   | AY651504  | AY651451   | AY651393  | AY651558  | HK821      | HK821 | HK821       | HK821 | HK821 | HK821 | HK821 | HK821        | HK821      |
| 2004 | Ck/VN/37/04           | Public | VN3 |              | AY651725  | AY651671  | AY651617  | AY651340   | AY651505  | AY651452   | AY651394  | AY651559  | HK821      | HK821 | HK821       | HK821 | HK821 | HK821 | HK821 | HK821        | HK821      |
| 2004 | Ck/VN/38/04           | Public | VN3 |              | AY651726  | AY651672  | AY651618  | AY651341   | AY651506  | AY651453   | AY651395  | AY651560  | HK821      | HK821 | HK821       | HK821 | HK821 | HK821 | HK821 | HK821        | HK821      |
| 2004 | Ck/VN/39/04           | Public | VN3 |              | AY651727  | AY651673  | AY651619  | AY651342   | AY651507  | AY651454   | AY651396  | AY651561  | HK821      | HK821 | HK821       | HK821 | HK821 | HK821 | HK821 | HK821        | HK821      |
| 2004 | Ck/VN/486A/04         | Public |     |              |           |           |           |            |           | DQ884460   |           |           |            |       |             |       |       |       | HK821 |              |            |
| 2004 | Ck/VN/52/04           | Public | VN3 | BINH DINH    | DQ492874  | DQ493398  | DQ493311  | DQ497698   | DQ493136  | DQ493047   | DQ492959  | DQ493223  | HK821      | HK821 | HK821       | HK821 | HK821 | HK821 | HK821 | HK821        | HK821      |
| 2004 | Ck/VN/53/04           | Public | VN3 | KHANH HOA    | DQ492885  | DQ493409  | DQ493323  | DQ497710   | DQ493147  | DQ493059   | DQ492971  | DQ493235  | HK821      | HK821 | HK821       | HK821 | HK821 | HK821 | HK821 | HK821        | HK821      |
| 2004 | Ck/VN/AG-010/04       | Public | VN3 | AN GIANG     | DQ138170  | DQ138149  | AY724790  | AY724789   | DQ099765  | DQ094278   | DQ094256  | AY770612  | HK821      | HK821 | HK821       | HK821 | HK821 | HK821 | HK821 | HK821        | HK821      |
| 2004 | Ck/VN/C57/04          | Public | VN3 |              | AY651728  | AY651674  | AY651620  | AY651343   | AY651508  | AY651455   | AY651397  | AY651562  | HK821      | HK821 | HK821       | HK821 | HK821 | HK821 | HK821 | HK821        | HK821      |
| 2004 | Ck/VN/C58/04          | Public | VN3 |              | AY818127  | AY818130  | AY818133  | AY818136   | AY818139  | AY818142   | AY818145  | AY818148  | HK821      | HK821 | HK821       | HK821 | HK821 | HK821 | HK821 | HK821        | HK821      |
| 2004 | Ck/VN/CM/04           | Public |     | CA MAU       |           |           |           | AY576927   | AY576929  | AY576928   |           |           |            |       |             | HK821 | HK821 | HK821 |       |              |            |
| 2004 | Ck/VN/CT-018/04       | Public | VN3 | CAN THO      | DQ138172  | DQ138151  | DQ099786  | AY724793   | DQ099767  | DQ094280   | DQ094258  | AY770614  | HK821      | HK821 | HK821       | HK821 | HK821 | HK821 | HK821 | HK821        | HK821      |
| 2004 | Ck/VN/DN-045/04       | Public | VN3 | DONG NAI     | DQ138176  | DQ138155  | AY724786  | AY724785   | DQ099771  | DQ094284   | DQ094262  | AY770618  | HK821      | HK821 | HK821       | HK821 | HK821 | HK821 | HK821 | HK821        | HK821      |
| 2004 | Ck/VN/DT-015/04       | Public | VN3 | DONG THAP    | DQ138171  | DQ138150  | AY724792  | AY724791   | DQ099766  | DQ094279   | DQ094257  | AY770613  | HK821      | HK821 | HK821       | HK821 | HK821 | HK821 | HK821 | HK821        | HK821      |
| 2004 | Ck/VN/DT171/04        | Public | VN3 | DONG THAP    | DQ320871  | DQ321331  | DQ321265  | DQ320937   | DQ321133  | DQ321068   | DQ321006  | DQ321199  | HK821      | HK821 | HK821       | HK821 | HK821 | HK821 | HK821 | HK821        | HK821      |
| 2004 | Ck/VN/DT-171/04       | Public | VN3 | DONG THAP    | DQ138177  | DQ138156  | DQ099788  | DQ099759   | DQ099772  | AY720943   | DQ094263  | AY770619  | HK821      | HK821 | HK821       | HK821 | HK821 | HK821 | HK821 | HK821        | HK821      |
| 2004 | Ck/VN/HauGiang-178/04 | Public |     | HAU GIANG    |           |           |           | AY728892   |           | AY728893   |           |           |            |       |             | HK821 |       |       | HK821 |              |            |
| 2004 | Ck/VN/HauGiang-617/04 | Public |     | HAU GIANG    |           |           |           | AY728894   |           | AY728895   |           |           |            |       |             | HK821 |       |       | HK821 |              |            |
| 2004 | Ck/VN/HCM-022/04      | Public | VN3 | HOU CHI MING | DQ138175  | DQ138154  | AY724784  | AY724783   | DQ099770  | DQ094283   | DQ094261  | AY770617  | HK821      | HK821 | HK821       | HK821 | HK821 | HK821 | HK821 | HK821        | HK821      |
| 2004 | Ck/VN/HD1/04          | Public |     | HA TAY       |           |           |           | AY574187   | AY574189  | AY574188   |           |           |            |       |             | HK821 | HK821 | HK821 |       |              |            |
| 2004 | Ck/VN/HD2/04          | Public |     | HA TAY       |           |           |           | AY574190   | AY574192  | AY574191   |           |           |            |       |             | HK821 | HK821 | HK821 |       |              |            |
| 2004 | Ck/VN/KG-076/04       | Public |     | KIEN GIANG   |           | DQ138157  | DQ099789  |            |           | DQ099773   | DQ094285  | DQ094264  | AY770620   |       |             | HK821 | HK821 |       | HK821 | HK821        | HK821      |

|      |                     |        |     |              |          |          |          |          |          |          |          |          |       |       |       |       |       |       |       |       |
|------|---------------------|--------|-----|--------------|----------|----------|----------|----------|----------|----------|----------|----------|-------|-------|-------|-------|-------|-------|-------|-------|
| 2004 | Ck/VN/LA-024/04     | Public | VN3 | LONG AN      | DQ138174 | DQ138153 | AY724796 | AY724795 | DQ099769 | DQ094282 | DQ094260 | AY770616 | HK821 | HK821 | HK821 | HK821 | HK821 | HK821 | HK821 | HK821 |
| 2004 | Ck/VN/LD-080/04     | Public | VN3 | LAM DONG     | DQ138178 | DQ138158 | DQ099790 | DQ099760 | DQ099774 | DQ094287 | DQ094265 | AY770621 | HK821 | HK821 | HK821 | HK821 | HK821 | HK821 | HK821 | HK821 |
| 2004 | Ck/VN/TG-023/04     | Public | VN3 | TIEN GIANG   | DQ138173 | DQ138152 | DQ099787 | DQ099758 | DQ099768 | DQ094281 | DQ094259 | AY770615 | HK821 | HK821 | HK821 | HK821 | HK821 | HK821 | HK821 | HK821 |
| 2004 | Ck/VN/TN-025/04     | Public | VN3 | TAY NINH     | DQ138166 | DQ138145 | DQ099784 | DQ099755 | DQ099761 | DQ094276 | DQ094252 | AY770609 | HK821 | HK821 | HK821 | HK821 | HK821 | HK821 | HK821 | HK821 |
| 2004 | Ck/VN/VL-008/04     | Public | VN3 | VINH LONG    | DQ138169 | DQ138148 | AY724788 | AY724787 | DQ099764 | DQ094277 | DQ094255 | AY770611 | HK821 | HK821 | HK821 | HK821 | HK821 | HK821 | HK821 | HK821 |
| 2004 | Dk/VN/11/04         | Public | VN3 |              | AY651729 | AY651675 | AY651621 | AY651344 | AY651509 | AY651456 | AY651398 | AY651563 | HK821 | HK821 | HK821 | HK821 | HK821 | HK821 | HK821 | HK821 |
| 2004 | Dk/VN/148/04        | Public | VN3 | CAN THO      | DQ492877 | DQ493401 | DQ493315 | DQ497702 | DQ493140 | DQ493051 | DQ492963 | DQ493227 | HK821 | HK821 | HK821 | HK821 | HK821 | HK821 | HK821 | HK821 |
| 2004 | Dk/VN/219/04        | Public | VN3 | HA TAY       | DQ492860 | DQ493384 | DQ493297 | DQ497684 | DQ493122 | DQ493033 | DQ492945 | DQ493209 | HK821 | HK821 | HK821 | HK821 | HK821 | HK821 | HK821 | HK821 |
| 2004 | Dk/VN/220/04        | Public | VN3 | HA TAY       | DQ492861 | DQ493385 | DQ493298 | DQ497685 | DQ493123 | DQ493034 | DQ492946 | DQ493210 | HK821 | HK821 | HK821 | HK821 | HK821 | HK821 | HK821 | HK821 |
| 2004 | Dk/VN/258/04        | Public | VN3 | TRA VINH     | DQ492893 | DQ493415 | DQ493329 | DQ497716 | DQ493153 | DQ493065 | DQ492977 | DQ493241 | HK821 | HK821 | HK821 | HK821 | HK821 | HK821 | HK821 | HK821 |
| 2004 | Dk/VN/40/04         | Public | VN3 | HA NOI       | DQ492849 | DQ493373 | DQ493287 | DQ497673 | DQ493111 | DQ493022 | DQ492934 | DQ493198 | HK821 | HK821 | HK821 | HK821 | HK821 | HK821 | HK821 | HK821 |
| 2004 | Dk/VN/48/04         | Public | VN3 | HA TAY       | DQ492859 | DQ493383 | DQ493296 | DQ497683 | DQ493121 | DQ493032 | DQ492944 | DQ493208 | HK821 | HK821 | HK821 | HK821 | HK821 | HK821 | HK821 | HK821 |
| 2004 | Dk/VN/CM-V7/04      | Public |     | CA MAU       | DQ138180 | DQ138162 | DQ138183 |          | DQ099778 | DQ094289 | DQ094269 |          | HK821 | HK821 | HK821 |       | HK821 | HK821 | HK821 |       |
| 2004 | Dk/VN/N-XX/04       | Public | VN3 | HA TAY       | DQ492862 | DQ493386 | DQ493299 | DQ497686 | DQ493124 | DQ493035 | DQ492947 | DQ493211 | HK821 | HK821 | HK821 | HK821 | HK821 | HK821 | HK821 | HK821 |
| 2004 | Dk/VN/TG-007A/04    | Public | VN3 | TIEN GIANG   | DQ138167 | DQ138146 | AY720947 | DQ099756 | DQ099762 | AY720946 | DQ094253 | AY770610 | HK821 | HK821 | HK821 | HK821 | HK821 | HK821 | HK821 | HK821 |
| 2004 | Dk/VN/TV-V2/04      | Public |     | TRA VINH     | DQ138179 | DQ138161 | DQ138182 |          | DQ099777 | DQ094288 | DQ094268 |          | HK821 | HK821 | HK821 |       | HK821 | HK821 | HK821 |       |
| 2004 | Gs/VN/264/04        | Public | VN3 | HAU GIANG    | DQ492882 | DQ493406 | DQ493320 | DQ497707 | DQ493145 | DQ493056 | DQ492968 | DQ493232 | HK821 | HK821 | HK821 | HK821 | HK821 | HK821 | HK821 | HK821 |
| 2004 | Hanoi/03/04         | Public |     | HA NOI       |          |          |          | AJ715872 | AJ715873 |          |          |          |       |       |       | HK821 | HK821 |       |       |       |
| 2004 | Hatay/04/           | Public |     | HA TAY       |          |          |          | AJ867074 | AJ867076 | AJ867075 | AM040045 | AM040046 |       |       |       |       | HK821 | HK821 | HK821 | HK821 |
| 2004 | M.Dk/VN/MdGL/04     | Public |     |              |          |          |          | AY576930 | AY576931 |          |          |          |       |       |       | HK821 | HK821 |       |       |       |
| 2004 | MallardDk/VN/133/04 | Public |     |              | DQ320873 |          |          | DQ320940 |          |          |          |          | HK821 |       |       | HK821 |       |       |       |       |
| 2004 | quail/VN/177/04     | Public | VN3 | TRA VINH     | DQ492890 | DQ493414 | DQ493328 | DQ497715 | DQ493152 | DQ493064 | DQ492976 | DQ493240 | HK821 | HK821 | HK821 | HK821 | HK821 | HK821 | HK821 | HK821 |
| 2004 | quail/VN/36/04      | Public | VN3 |              | AY818128 | AY818131 | AY818134 | AY818137 | AY818140 | AY818143 | AY818146 | AY818149 | HK821 | HK821 | HK821 | HK821 | HK821 | HK821 | HK821 | HK821 |
| 2004 | quail/VN/TG-007B/04 | Public |     | TIEN GIANG   | DQ138168 | DQ138147 | DQ099785 | DQ099757 | DQ099763 |          | DQ094254 |          | HK821 | HK821 | HK821 | HK821 | HK821 |       | HK821 |       |
| 2004 | VN/1194/04          | Public | VN3 |              | AY651718 | AY651664 | AY651610 | EF541402 | AY651498 | EF541466 | AY651387 | AY651552 | HK821 | HK821 | HK821 | HK821 | HK821 | HK821 | HK821 | HK821 |
| 2004 | VN/1196/04          | Public | VN3 |              | AY526752 | AY526751 | AY526750 | AY526745 | AY526749 | AY526746 | AY526748 | AY526747 | HK821 | HK821 | HK821 | HK821 | HK821 | HK821 | HK821 | HK821 |
| 2004 | VN/1203/04          | Public | VN3 |              | EF467805 | EF467808 | AY818132 | EF541403 | AY818138 | EF541467 | AY818144 | AY818147 | HK821 | HK821 | HK821 | HK821 | HK821 | HK821 | HK821 | HK821 |
| 2004 | VN/1204/04          | Public |     |              | EF467806 | EF467809 | EF473407 | EF541404 |          |          |          | EF541457 | HK821 | HK821 | HK821 | HK821 |       |       |       | HK821 |
| 2004 | VN/3046/04          | Public | VN3 |              | AY651720 | AY651666 | AY651613 | AY651335 | AY651500 | AY651446 | AY651389 | AY651554 | HK821 | HK821 | HK821 | HK821 | HK821 | HK821 | HK821 | HK821 |
| 2004 | VN/3062/04          | Public | VN3 |              | AY651721 | AY651667 | AY651612 | AY651336 | AY651501 | AY651448 | AY651390 | AY651555 | HK821 | HK821 | HK821 | HK821 | HK821 | HK821 | HK821 | HK821 |
| 2004 | VN/3212/04          | Public |     |              |          |          |          | EF451059 |          |          |          |          | HK821 | HK821 | HK821 | HK821 |       | HK821 | HK821 | HK821 |
| 2004 | VN/33/04            | Public |     |              |          |          |          |          | DQ099776 |          |          |          |       |       |       |       | HK821 |       |       |       |
| 2004 | VN/CL01/04          | Public | VN3 | HOU CHI MING | DQ492894 | DQ493418 | DQ493332 | DQ497719 | DQ493156 | DQ250159 | DQ492980 | DQ493244 | HK821 | HK821 | HK821 | HK821 | HK821 | HK821 | HK821 | HK821 |
| 2004 | VN/CL02/04          | Public |     | SOC TRANG    | DQ492895 | DQ493419 |          | DQ497720 | DQ493157 | DQ493069 | DQ492981 | DQ493245 | HK821 | HK821 |       | HK821 | HK821 | HK821 | HK821 | HK821 |
| 2004 | VN/CL100/04         | Public | VN3 | TAY NINH     | DQ492898 | DQ493424 | DQ493337 | DQ497725 | DQ493162 | DQ250162 | DQ492986 | DQ493250 | HK821 | HK821 | HK821 | HK821 | HK821 | HK821 | HK821 | HK821 |
| 2004 | VN/CL17/04          | Public |     | LAM DONG     |          | DQ493420 | DQ493333 | DQ497721 | DQ493158 | DQ493070 | DQ492982 | DQ493246 |       | HK821 | HK821 |       | HK821 | HK821 | HK821 | HK821 |
| 2004 | VN/CL20/04          | Public |     | LAM DONG     |          | DQ493421 | DQ493334 | DQ497722 | DQ493159 | DQ493071 | DQ492983 | DQ493247 |       | HK821 | HK821 |       | HK821 | HK821 | HK821 | HK821 |
| 2004 | VN/CL26/04          | Public | VN3 | LAM DONG     | DQ492896 | DQ493422 | DQ493335 | DQ497723 | DQ493160 | DQ493072 | DQ492984 | DQ493248 | HK821 | HK821 | HK821 | HK821 | HK821 | HK821 | HK821 | HK821 |
| 2004 | VN/CL36/04          | Public | VN3 | BINH DINH    | DQ492897 | DQ493423 | DQ493336 | DQ497724 | DQ493161 | DQ250161 | DQ492985 | DQ493249 | HK821 | HK821 | HK821 | HK821 | HK821 | HK821 | HK821 | HK821 |
| 2004 | VN/DN-33/04         | Public |     | DONG NAI     | DQ138159 | DQ099791 | AY720950 |          |          | AY720948 | DQ094266 | AY720949 |       | HK821 | HK821 | HK821 |       | HK821 | HK821 | HK821 |
| 2004 | VN/HG-178/04        | Public |     | HA GIANG     | DQ138160 | DQ099792 |          |          | DQ099775 | DQ094286 | DQ094267 |          | HK821 | HK821 |       |       | HK821 | HK821 | HK821 |       |

|      |                  |        |             |            |           |           |            |          |            |           |           |           |            |        |              |              |              |              |              |            |
|------|------------------|--------|-------------|------------|-----------|-----------|------------|----------|------------|-----------|-----------|-----------|------------|--------|--------------|--------------|--------------|--------------|--------------|------------|
| 2004 | VN/HN/04         | Public | HA NOI      | AY720954   | AY720955  | AY720952  |            | AY720953 | AY720951   |           | HK821     | HK821     | HK821      |        | HK821        |              | HK821        |              |              |            |
| 2004 | VN/JP178/04      | Public | HA NOI      |            |           |           | EF456795   |          | EF456796   | ISDN69612 | HK821     | HK821     | HK821      | HK821  | HK821        | HK821        | HK821        |              |              |            |
| 2004 | Ck/VN/NCVD31/04  | NCVD   | VN3         | HA TAY     | ISDN40377 | ISDN40858 | ISDN40950  | EF541406 | ISDN41056  | ISDN38702 | ISDN45754 | ISDN45785 | HK821      | HK821  | HK821        | HK821        | HK821        |              |              |            |
| 2005 | Ck/VN/10/05      | Public | VN4         |            | CY016874  | CY016873  | CY016872   | CY016867 | CY016870   | CY016869  | CY016868  | CY016871  | F1(GX4016) | GX4016 | GX4016       | E319(GX4016) | E319(FJ584)  | GX4016(E319) | E319(GX4016) | F1(GX4016) |
| 2005 | Ck/VN/11/05      | Public | VN3         |            | CY016882  | CY016881  | CY016880   | CY016875 | CY016878   | CY016877  | CY016876  | CY016879  | HK821      | HK821  | HK821        | HK821        | HK821        | HK821        | HK821        | HK821      |
| 2005 | Ck/VN/2/05       | Public | VN3         |            | CY016842  | CY016841  | CY016840   | CY016835 | CY016838   | CY016837  | CY016836  | CY016839  | HK821      | HK821  | HK821        | HK821        | HK821        | HK821        | HK821        | HK821      |
| 2005 | Ck/VN/348/05     | Public | VN3         | HA NOI     | DQ492852  | DQ493376  | DQ493289   | DQ497676 | DQ493114   | DQ493025  | DQ492937  | DQ493201  | HK821      | HK821  | HK821        | HK821        | HK821        | HK821        | HK821        | HK821      |
| 2005 | Ck/VN/393/05     | Public | VN3         | KIEN GIANG | DQ492887  | DQ493411  | DQ493325   | DQ497712 | DQ493149   | DQ493061  | DQ492973  | DQ493237  | HK821      | HK821  | HK821        | HK821        | HK821        | HK821        | HK821        | HK821      |
| 2005 | Ck/VN/398/05     | Public | VN3         | DONG THAP  | DQ492878  | DQ493402  | DQ493316   | DQ497703 | DQ493141   | DQ493052  | DQ492964  | DQ493228  | HK821      | HK821  | HK821        | HK821        | HK821        | HK821        | HK821        | HK821      |
| 2005 | Ck/VN/6/05       | Public | VN3         |            | CY016850  | CY016849  | CY016848   | CY016843 | CY016846   | CY016845  | CY016844  | CY016847  | HK821      | HK821  | HK821        | HK821        | HK821        | HK821        | HK821        | HK821      |
| 2005 | Ck/VN/8/05       | Public | VN3         |            | CY016858  | CY016857  | CY016856   | CY016851 | CY016854   | CY016853  | CY016852  | CY016855  | HK821      | HK821  | HK821        | HK821        | HK821        | HK821        | HK821        | HK821      |
| 2005 | Ck/VN/9/05       | Public | VN3         |            | CY016866  | CY016865  | CY016864   | CY016859 | CY016862   | CY016861  | CY016860  | CY016863  | HK821      | HK821  | HK821        | HK821        | HK821        | HK821        | HK821        | HK821      |
| 2005 | Ck/VN/TY25/05    | Public | THAI NGUYEN |            |           |           | ISDN128309 |          | ISDN128355 |           |           |           |            |        |              |              |              |              |              | HK821      |
| 2005 | Ck/VN/TY31/05    | Public | THAI NGUYEN |            |           |           | ISDN128310 |          | ISDN128356 |           |           |           |            |        | E319(GX4016) | (GX604)      | GX4016(E319) |              |              |            |
| 2005 | Ck/VN/TY9/05     | Public | THAI NGUYEN |            |           |           | ISDN128308 |          | ISDN128354 |           |           |           |            |        | HK821        |              | HK821        |              |              |            |
| 2005 | Ck/VN/CT-437/05  | Public |             |            |           |           |            |          |            |           | DQ094270  |           |            |        |              |              |              |              |              | HK821      |
| 2005 | Ck/VN/P22/05     | Public |             |            |           |           | AM183674   |          | AM183679   |           |           |           |            |        | HK821        |              | HK821        |              |              |            |
| 2005 | Ck/VN/P41/05     | Public |             |            |           |           | AM183672   |          |            |           |           |           |            |        | HK821        |              |              |              |              |            |
| 2005 | Ck/VN/P78/05     | Public |             |            |           |           | AM183673   |          |            |           |           |           |            |        | HK821        |              |              |              |              |            |
| 2005 | Dk/VN/1/05       | Public | VN5         |            | CY016834  | CY016833  | CY016832   | CY016827 | CY016830   | CY016829  | CY016828  | CY016831  | HK97       | HK97   | HK97         | HK97         | HK97         | HK97         | HK97         | HK97       |
| 2005 | Dk/VN/1/05a      | Public | VN3         |            | DQ366303  | DQ366304  | DQ366305   | DQ366306 | DQ366307   | DQ366308  | DQ366309  | DQ366310  | HK821      | HK821  | HK821        | HK821        | HK821        | HK821        | HK821        | HK821      |
| 2005 | Dk/VN/12/05      | Public | VN4         |            | CY016890  | CY016889  | CY016888   | CY016883 | CY016886   | CY016885  | CY016884  | CY016887  | F1(GX4016) | GX4016 | GX4016       | E319(GX4016) | E319(FJ584)  | GX4016(E319) | E319(GX4016) | F1(GX4016) |
| 2005 | Dk/VN/18/05      | Public | VN3         |            | CY017074  | CY017073  | CY017072   | CY017067 | CY017070   | CY017069  | CY017068  | CY017071  | HK821      | HK821  | HK821        | HK821        | HK821        | HK821        | HK821        | HK821      |
| 2005 | Dk/VN/19/05      | Public | VN3         |            | CY017194  | CY017193  | CY017192   | CY017187 | CY017190   | CY017189  | CY017188  | CY017191  | HK821      | HK821  | HK821        | HK821        | HK821        | HK821        | HK821        | HK821      |
| 2005 | Dk/VN/20/05      | Public | VN3         |            | CY016898  | CY016897  | CY016896   | CY016891 | CY016894   | CY016893  | CY016892  | CY016895  | HK821      | HK821  | HK821        | HK821        | HK821        | HK821        | HK821        | HK821      |
| 2005 | Dk/VN/272/05     | Public | VN3         | HA NOI     | DQ492850  | DQ493374  | DQ493288   | DQ497674 | DQ493112   | DQ493023  | DQ492935  | DQ493199  | HK821      | HK821  | HK821        | HK821        | HK821        | HK821        | HK821        | HK821      |
| 2005 | Dk/VN/283/05     | Public | VN3         | HAU GIANG  | DQ492883  | DQ493407  | DQ493321   | DQ497708 | DQ493107   | DQ493057  | DQ492969  | DQ493233  | HK821      | HK821  | HK821        | HK821        | HK821        | HK821        | HK821        | HK821      |
| 2005 | Dk/VN/286/05     | Public | VN3         | BAC LIEU   | DQ492873  | DQ493397  | DQ493310   | DQ497697 | DQ493135   | DQ493046  | DQ492958  | DQ493222  | HK821      | HK821  | HK821        | HK821        | HK821        | HK821        | HK821        | HK821      |
| 2005 | Dk/VN/317/05     | Public | VN3         | THAI BINH  | DQ492865  | DQ493389  | DQ493302   | DQ497689 | DQ493127   | DQ493038  | DQ492950  | DQ493214  | HK821      | HK821  | HK821        | HK821        | HK821        | HK821        | HK821        | HK821      |
| 2005 | Dk/VN/367/05     | Public | DONG THAP   |            |           |           | EF566215   |          | EF566216   |           |           |           |            |        | HK821        |              | HK821        |              |              |            |
| 2005 | Dk/VN/376/05     | Public | VN3         | TRA VINH   | DQ492879  | DQ493403  | DQ493317   | DQ497704 | DQ493142   | DQ493053  | DQ492965  | DQ493229  | HK821      | HK821  | HK821        | HK821        | HK821        | HK821        | HK821        | HK821      |
| 2005 | Dk/VN/543/05     | Public | VN3         | HAU GIANG  | DQ492891  | DQ493416  | DQ493330   | DQ497717 | DQ493154   | DQ493066  | DQ492978  | DQ493242  | HK821      | HK821  | HK821        | HK821        | HK821        | HK821        | HK821        | HK821      |
| 2005 | Dk/VN/557/05     | Public | VN3         |            | DQ492884  | DQ493408  | DQ493322   | DQ497709 | DQ493146   | DQ493058  | DQ492970  | DQ493234  | HK821      | HK821  | HK821        | HK821        | HK821        | HK821        | HK821        | HK821      |
| 2005 | Dk/VN/568/05     | Public | VN4         |            | DQ320874  | DQ321333  | DQ321267   | DQ320939 | DQ321135   | DQ321070  | DQ321005  | DQ321201  | F1(GX4016) | GX4016 | GX4016       | E319(GX4016) | E319(FJ584)  | GX4016(E319) | E319(GX4016) | F1(GX4016) |
| 2005 | Dk/VN/8/05       | Public | VN5         |            | DQ366319  | DQ366320  | DQ366321   | DQ366322 | DQ366323   | DQ366324  | DQ366325  | DQ366326  | HK97       | HK97   | HK97         | HK97         | HK97         | HK97         | HK97         | HK97       |
| 2005 | Dk/VN/AG40-O2/05 | Public | AN GIANG    |            |           |           | AM183676   |          |            |           |           |           |            |        | HK821        |              |              |              |              |            |
| 2005 | Dk/VN/N-TB/05    | Public | VN3         | THAI BINH  | DQ492864  | DQ493388  | DQ493301   | DQ497688 | DQ493126   | DQ493037  | DQ492949  | DQ493213  | HK821      | HK821  | HK821        | HK821        | HK821        | HK821        | HK821        | HK821      |
| 2005 | Dk/VN/S640/05    | Public | VN3         | AN GIANG   | DQ492870  | DQ493394  | DQ493307   | DQ497694 | DQ493132   | DQ493043  | DQ492955  | DQ493219  | HK821      | HK821  | HK821        | HK821        | HK821        | HK821        | HK821        | HK821      |
| 2005 | Dk/VN/S649/05    | Public | CA MAU      |            |           |           | DQ493312   | DQ497699 | DQ493137   | DQ493048  | DQ492960  | DQ493224  |            |        | HK821        | HK821        | HK821        | HK821        | HK821        | HK821      |
| 2005 | Dk/VN/S654/05    | Public | VN3         | CAN THO    | DQ320863  | DQ321335  | DQ321269   | DQ320936 | DQ321137   | DQ321067  | DQ321002  | DQ321203  | HK821      | HK821  | HK821        | HK821        | HK821        | HK821        | HK821        | HK821      |
| 2005 | Dk/VN/TG24-O1/05 | Public | TUYEN QUANG |            |           |           | AM183677   |          | AM183678   |           |           |           |            |        | HK821        |              | HK821        |              |              |            |











|      |                         |      |     |           |          |          |          |          |          |          |          |          |             |             |             |             |             |              |       |       |
|------|-------------------------|------|-----|-----------|----------|----------|----------|----------|----------|----------|----------|----------|-------------|-------------|-------------|-------------|-------------|--------------|-------|-------|
| 2007 | Gs/LAOS/NCVD-39/07*     | NCVD | VN6 | LAO PDR   | CY030490 | CY030491 | CY030492 | CY030493 | CY030494 | CY030495 | CY030496 | CY030497 | GX604(E319) | FJ584(E319) | FJ584(E319) | FJ584(E319) | E319(FJ584) | FJ584        | FJ584 | FJ584 |
| 2007 | M.Dk/VN/NCVD-11/07      | NCVD | VN3 | BAC LIEU  | CY030316 | CY030317 | CY030318 | CY030319 | CY030320 | CY030321 | CY030322 | CY030323 | HK821       | HK821       | HK821       | HK821       | HK821       | HK821        | HK821 | HK821 |
| 2007 | M.Dk/VN/NCVD-22/07      | NCVD | VN8 | CA MAU    | CY030396 | CY030397 | CY030398 | CY030399 | CY030400 | CY030401 | CY030402 | CY030403 | GX604(E319) | FJ584(E319) | HK821       | FJ584       | HK821       | GX4016(E319) | FJ584 | HK821 |
| 2007 | M.Dk/VN/NCVD-23/07      | NCVD | VN3 | CA MAU    | CY030404 | CY030405 | CY030406 | CY030407 | CY030408 | CY030409 | CY030410 | CY030411 | HK821       | HK821       | HK821       | HK821       | HK821       | HK821        | HK821 | HK821 |
| 2007 | M.Dk/VN/NCVD-29/07      | NCVD | VN3 | CA MAU    | CY030436 | CY030437 | CY030721 | CY030438 | CY030439 | CY030440 | CY030441 | CY030442 | HK821       | HK821       | HK821       | HK821       | HK821       | HK821        | HK821 | HK821 |
| 2007 | M.Dk/VN/NCVD-4/07       | NCVD | VN3 | CA MAU    | CY030260 | CY030261 | CY030262 | CY030263 | CY030264 | CY030265 | CY030266 | CY030267 | HK821       | HK821       | HK821       | HK821       | HK821       | HK821        | HK821 | HK821 |
| 2007 | M.Dk/VN/NCVD-46/07      | NCVD | VN6 | HAI DUONG | CY030725 | CY030543 | CY030726 | CY030544 | CY030545 | CY030546 | CY030547 | CY030548 | GX604(E319) | FJ584       | FJ584       | FJ584       | E319(FJ584) | FJ584        | FJ584 | FJ584 |
| 2007 | M.Dk/VN/NCVD-5/07       | NCVD | VN3 | CA MAU    | CY030268 | CY030269 | CY030270 | CY030271 | CY030272 | CY030273 | CY030274 | CY030275 | HK821       | HK821       | HK821       | HK821       | HK821       | HK821        | HK821 | HK821 |
| 2007 | PIGEON/LAOS/NCVD-36/07* | NCVD |     | LAO PDR   |          | CY030475 |          | CY030477 | CY030478 | CY030479 | CY030480 | CY030481 |             | FJ584(E319) |             | FJ584       | E319(FJ584) | FJ584        | FJ584 | FJ584 |

\*: Four strains from LAOS.
