# Supplementary material for: Evolution of Highly Pathogenic H5N1 Avian Influenza Viruses in Vietnam between 2001 and 2007
Source: PubMed Central journal article supplement (PMC2565130; doi:10.1371/journal.pone.0003462), 2008-10-21
Supplement: pone.0003462.s002.pdf [file pone.0003462.s002.pdf]

**Table S2. Number of H5N1 isolates collected and percentage of each identified genotype in**

| Genotype   | Year      |            |            |            |      |            |
|------------|-----------|------------|------------|------------|------|------------|
|            | 2001      | 2003       | 2004       | 2005       | 2006 | 2007       |
| VN1        | 2 (100%)* |            |            |            |      |            |
| VN2        |           | 2 (4.8%)   |            |            |      |            |
| VN3        |           | 19 (46.3%) | 52 (65.8%) | 62 (36.5%) |      | 25 (62.5%) |
| VN4        |           |            |            | 15 (8.8%)  |      |            |
| VN5        |           |            |            | 3 (1.8%)   |      |            |
| VN6        |           |            |            |            |      | 7 (17.5%)  |
| VN7        |           |            |            |            |      | 2 (5%)     |
| VN8        |           |            |            |            |      | 1 (2.5%)   |
| VN9        |           |            |            |            |      | 1 (2.5%)   |
| Unknown*** |           | 20 (48.8%) | 27 (34.2%) | 90 (52.9%) |      | 4 (10%)    |
| Total      | 2         | 41         | 79         | 170        |      | 40         |

\*The number in the parenthesis is the percentage of isolates from each genotype per year.

\*\*The number in the parenthesis is the total percentage of isolates from each genotype from 2001 to 2007.

\*\*\*Unknown denotes the viral genotype was not defined because complete genome sequences were not available.

**Vietnam per year.**

---

| Total       |
|-------------|
| 2 (0.6%)**  |
| 2 (0.6%)    |
| 158 (47.6%) |
| 15 (4.5%)   |
| 3 (0.9%)    |
| 7 (2.1%)    |
| 2 (0.6%)    |
| 1 (0.3%)    |
| 1 (0.3%)    |
| 141 (42.5%) |
| 332         |

---
