# Supplementary material for: Evolution of Highly Pathogenic H5N1 Avian Influenza Viruses in Vietnam between 2001 and 2007
Source: PubMed Central journal article supplement (PMC2565130; doi:10.1371/journal.pone.0003462), 2008-10-21
Supplement: pone.0003462.s003.pdf [file pone.0003462.s003.pdf]

**Table S3. Geographic origin of HPAI H5N1 viruses from Vietnam.**

| Province    | northern Vietnam |       |       |      |      | Province        | southern Vietnam |      |      |      |      |
|-------------|------------------|-------|-------|------|------|-----------------|------------------|------|------|------|------|
|             | 2003             | 2004  | 2005  | 2006 | 2007 |                 | 2003             | 2004 | 2005 | 2006 | 2007 |
| Bac Can     |                  |       |       |      |      | An Giang        |                  | 1(1) | 7(3) |      |      |
| Bac Giang   |                  |       |       |      |      | Ba Ria-Vung Tau |                  |      |      |      |      |
| Bac Ninh    | 2                |       | 4     |      |      | Bac Lieu        |                  | 2(2) | 2(2) |      | 6    |
| Cao Bang    |                  |       |       |      |      | Ben Tre         |                  |      |      |      |      |
| Dien Bien   |                  |       |       |      |      | Binh Dinh       |                  | 2(2) |      |      |      |
| Ha Giang    |                  | 1(1)* | 2(1)  |      |      | Binh Duong      |                  |      |      | 1    |      |
| Ha Nam      |                  |       |       |      |      | Binh Phuoc      |                  |      |      |      |      |
| Ha Tay      | 15(7)            | 8(7)  | 7     |      | 4    | Binh Thuan      |                  |      |      |      |      |
| Ha Tinh     |                  |       |       |      |      | Ca Mau          |                  | 2(2) | 1(1) |      | 8    |
| Hai Duong   |                  |       | 3     |      | 3    | Can Tho         |                  | 4(4) | 2(2) |      |      |
| Haiphong    |                  |       | 5     |      |      | Da Nang         |                  |      |      |      |      |
| Hanoi       | 8(3)             | 4(4)  | 15(7) |      | 3    | Dac Lac         |                  |      |      |      |      |
| Hoa Binh    |                  |       |       |      |      | Dac Nong        |                  |      |      |      |      |
| Hung Yen    | 3                |       |       |      |      | Dong Nai        |                  | 2(2) |      |      |      |
| Lai Chau    |                  |       |       |      |      | Dong Thap       |                  | 3(3) | 9(9) |      |      |
| Lang Son    |                  |       |       |      |      | Gia Lai         |                  |      |      |      |      |
| Lao Cai     |                  |       | 1     |      |      | Hau Giang       |                  | 4(4) | 4(4) |      | 5    |
| Nam Dinh    |                  |       | 3     |      |      | Ho Chi Minh     |                  | 2(2) |      |      |      |
| Nghe An     |                  |       | 1     |      |      | Khanh Hoa       |                  | 1(1) |      |      |      |
| Ninh Binh   |                  |       | 4     |      |      | Kien Giang      |                  | 1(1) | 2(2) |      | 5    |
| Phu Tho     | 1                |       | 2     |      |      | Kon Tum         |                  |      |      |      |      |
| Quang Binh  | 1                |       | 1     |      |      | Lam Dong        |                  | 4(4) |      |      |      |
| Quang Ninh  |                  |       | 1     |      |      | Long An         |                  | 1(1) | 2(1) |      |      |
| Son La      |                  |       |       |      |      | Ninh Thuan      |                  |      |      |      |      |
| Thai Binh   |                  | 1(1)  | 4(2)  |      |      | Phu Yen         |                  |      |      |      |      |
| Thai Nguyen |                  |       | 4(3)  |      |      | Quang Nam       |                  |      |      |      |      |
| Thanh Hoa   |                  |       | 1     |      |      | Quang Ngai      |                  |      |      |      |      |
| Tuyen Quang |                  |       | 2(2)  |      |      | Quang Tri       |                  |      |      |      |      |
| Vinh Phuc   | 10(4)            |       | 7     |      |      | Soc Trang       |                  | 2(2) | 2    |      | 2    |
| Yen Bai     |                  |       | 1     |      |      | Tay Ninh        |                  | 2(2) |      |      |      |
|             |                  |       |       |      |      | Thua Thien-Hue  |                  |      |      |      |      |
|             |                  |       |       |      |      | Tien Giang      |                  | 4(4) | 6    |      |      |
|             |                  |       |       |      |      | Tra Vinh        |                  | 3(3) | 2(2) |      |      |
|             |                  |       |       |      |      | Vinh Long       |                  | 2(2) | 2(2) |      | 1    |

\*The numbers in parentheses indicate those viruses were from public databases.
