# Supplementary material for: Evolution of Highly Pathogenic H5N1 Avian Influenza Viruses in Vietnam between 2001 and 2007
Source: PubMed Central journal article supplement (PMC2565130; doi:10.1371/journal.pone.0003462), 2008-10-21
Supplement: pone.0003462.s004.pdf [file pone.0003462.s004.pdf]

Figure S1A HA

WHO HA Nomenclature Clade

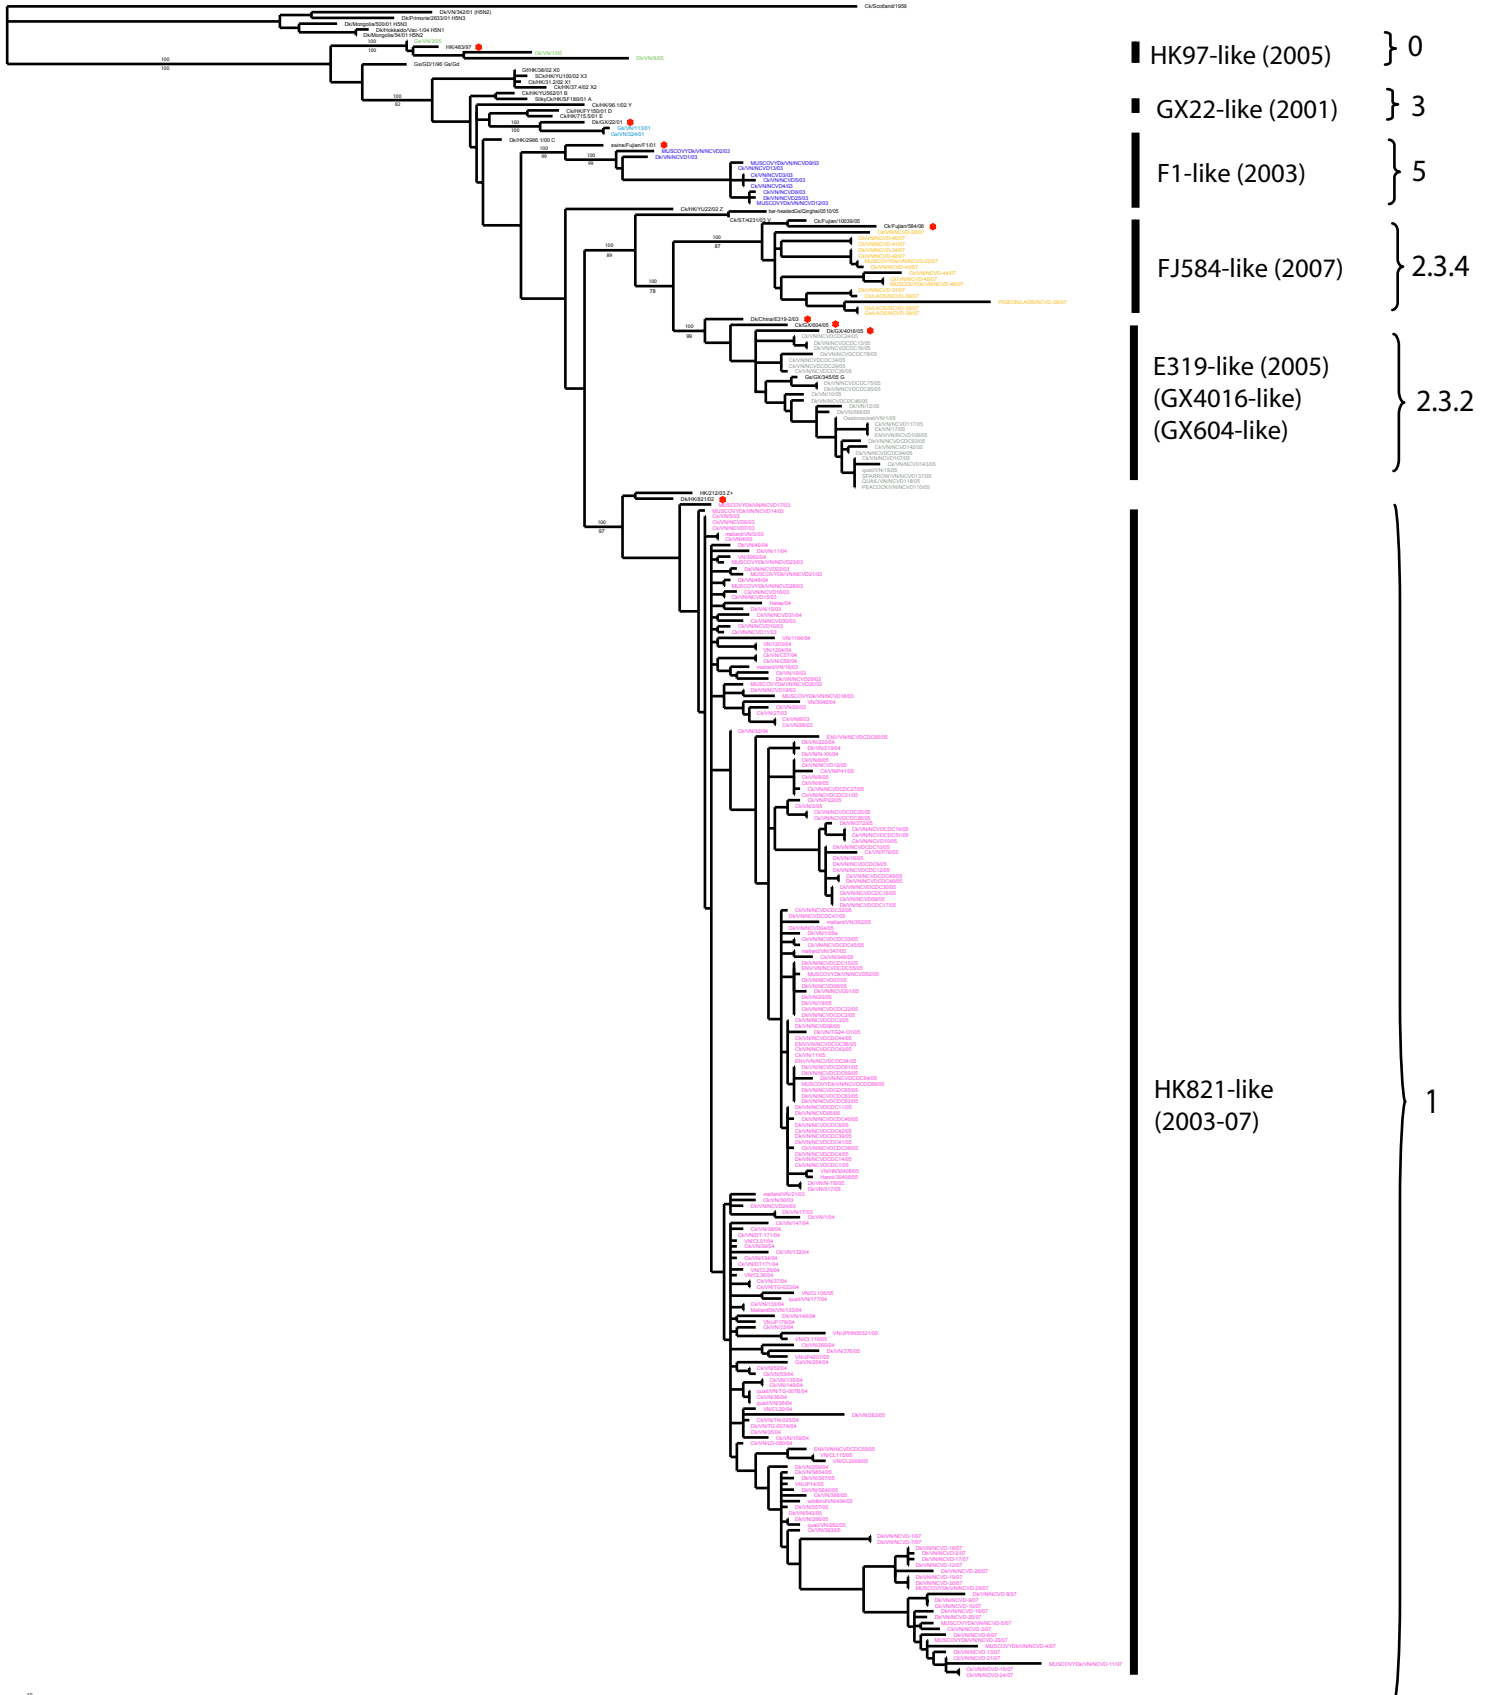

Figure S1B NA

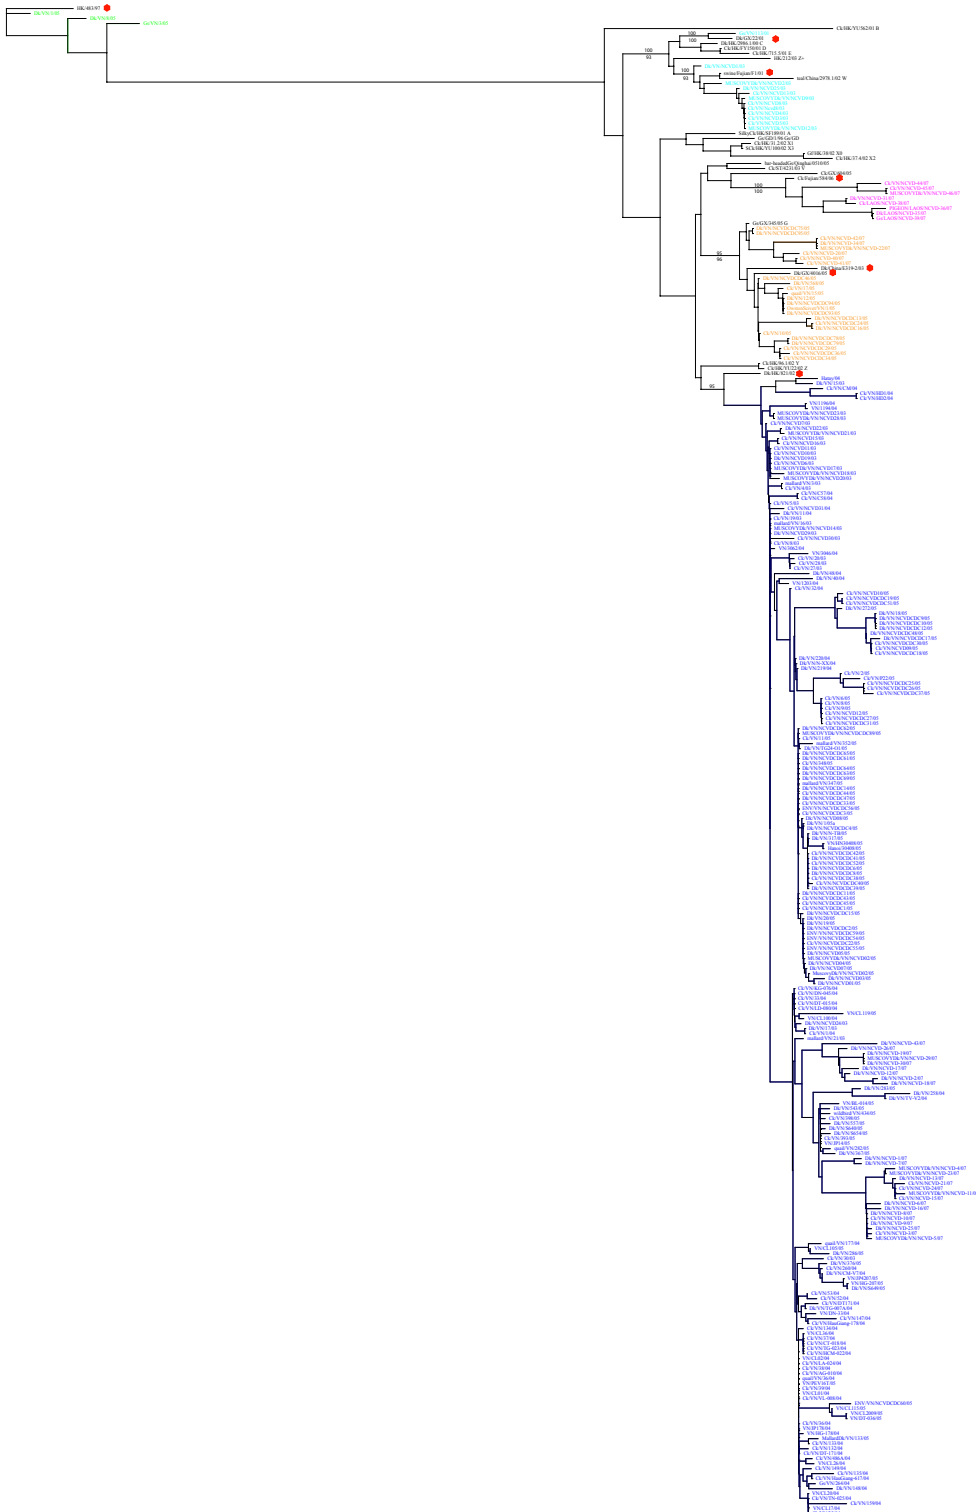

■ HK97-like  
■ GX22-like

■ F1-like

■ FJ584-like

■ GX4016-like  
(E319-like)

■ HK821-like

Figure S1C PB2

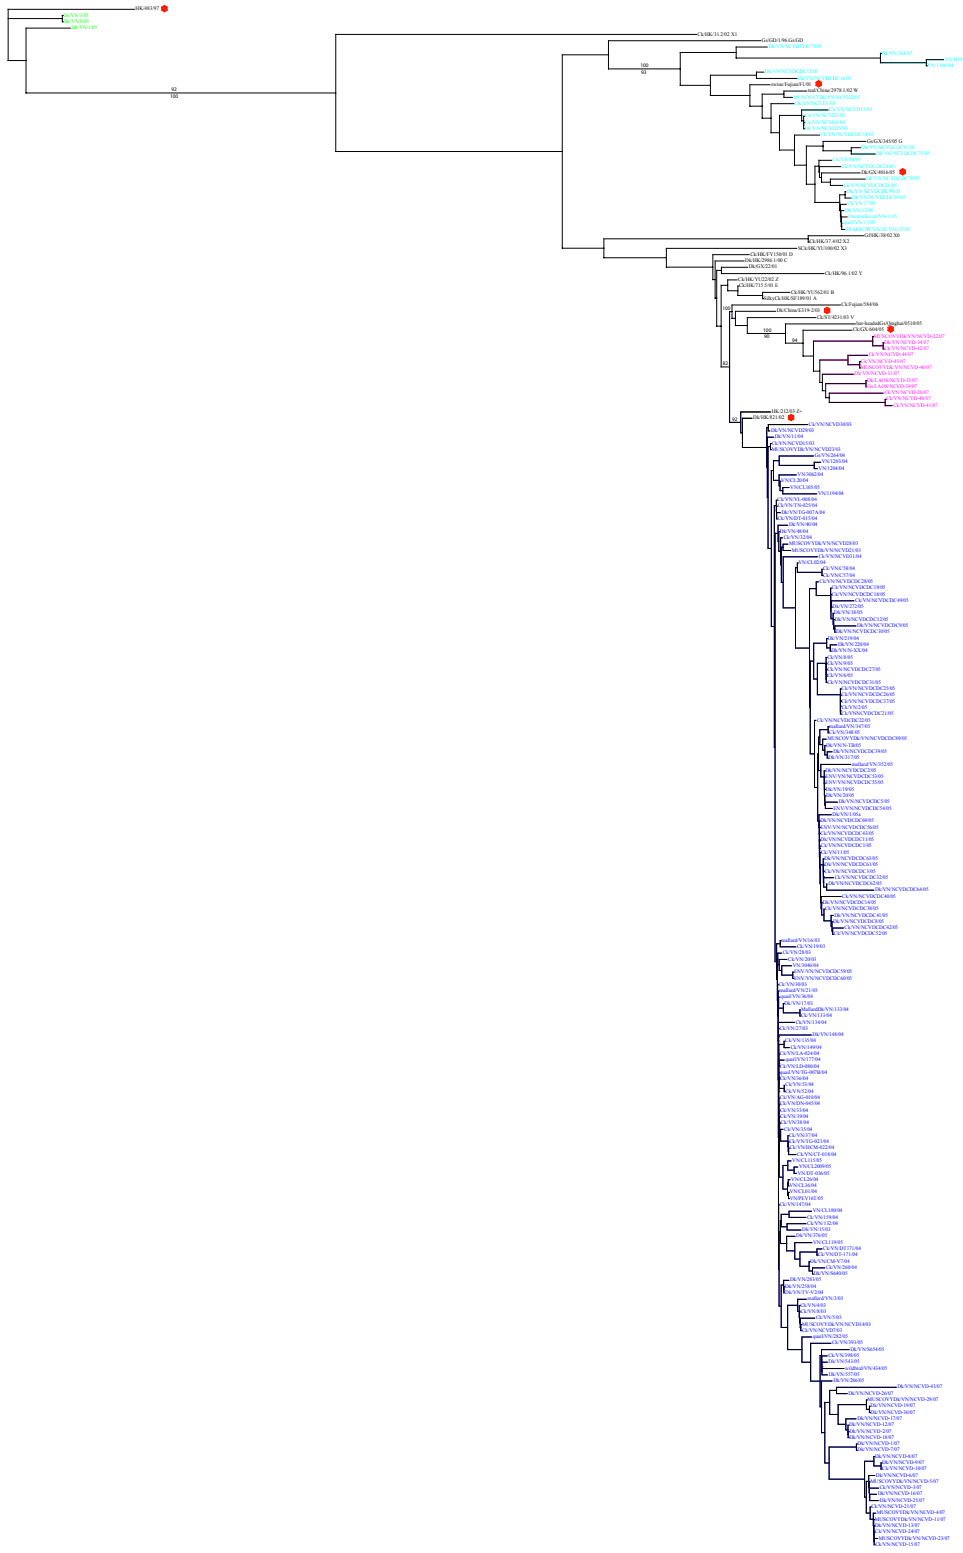

Figure S1D PB1

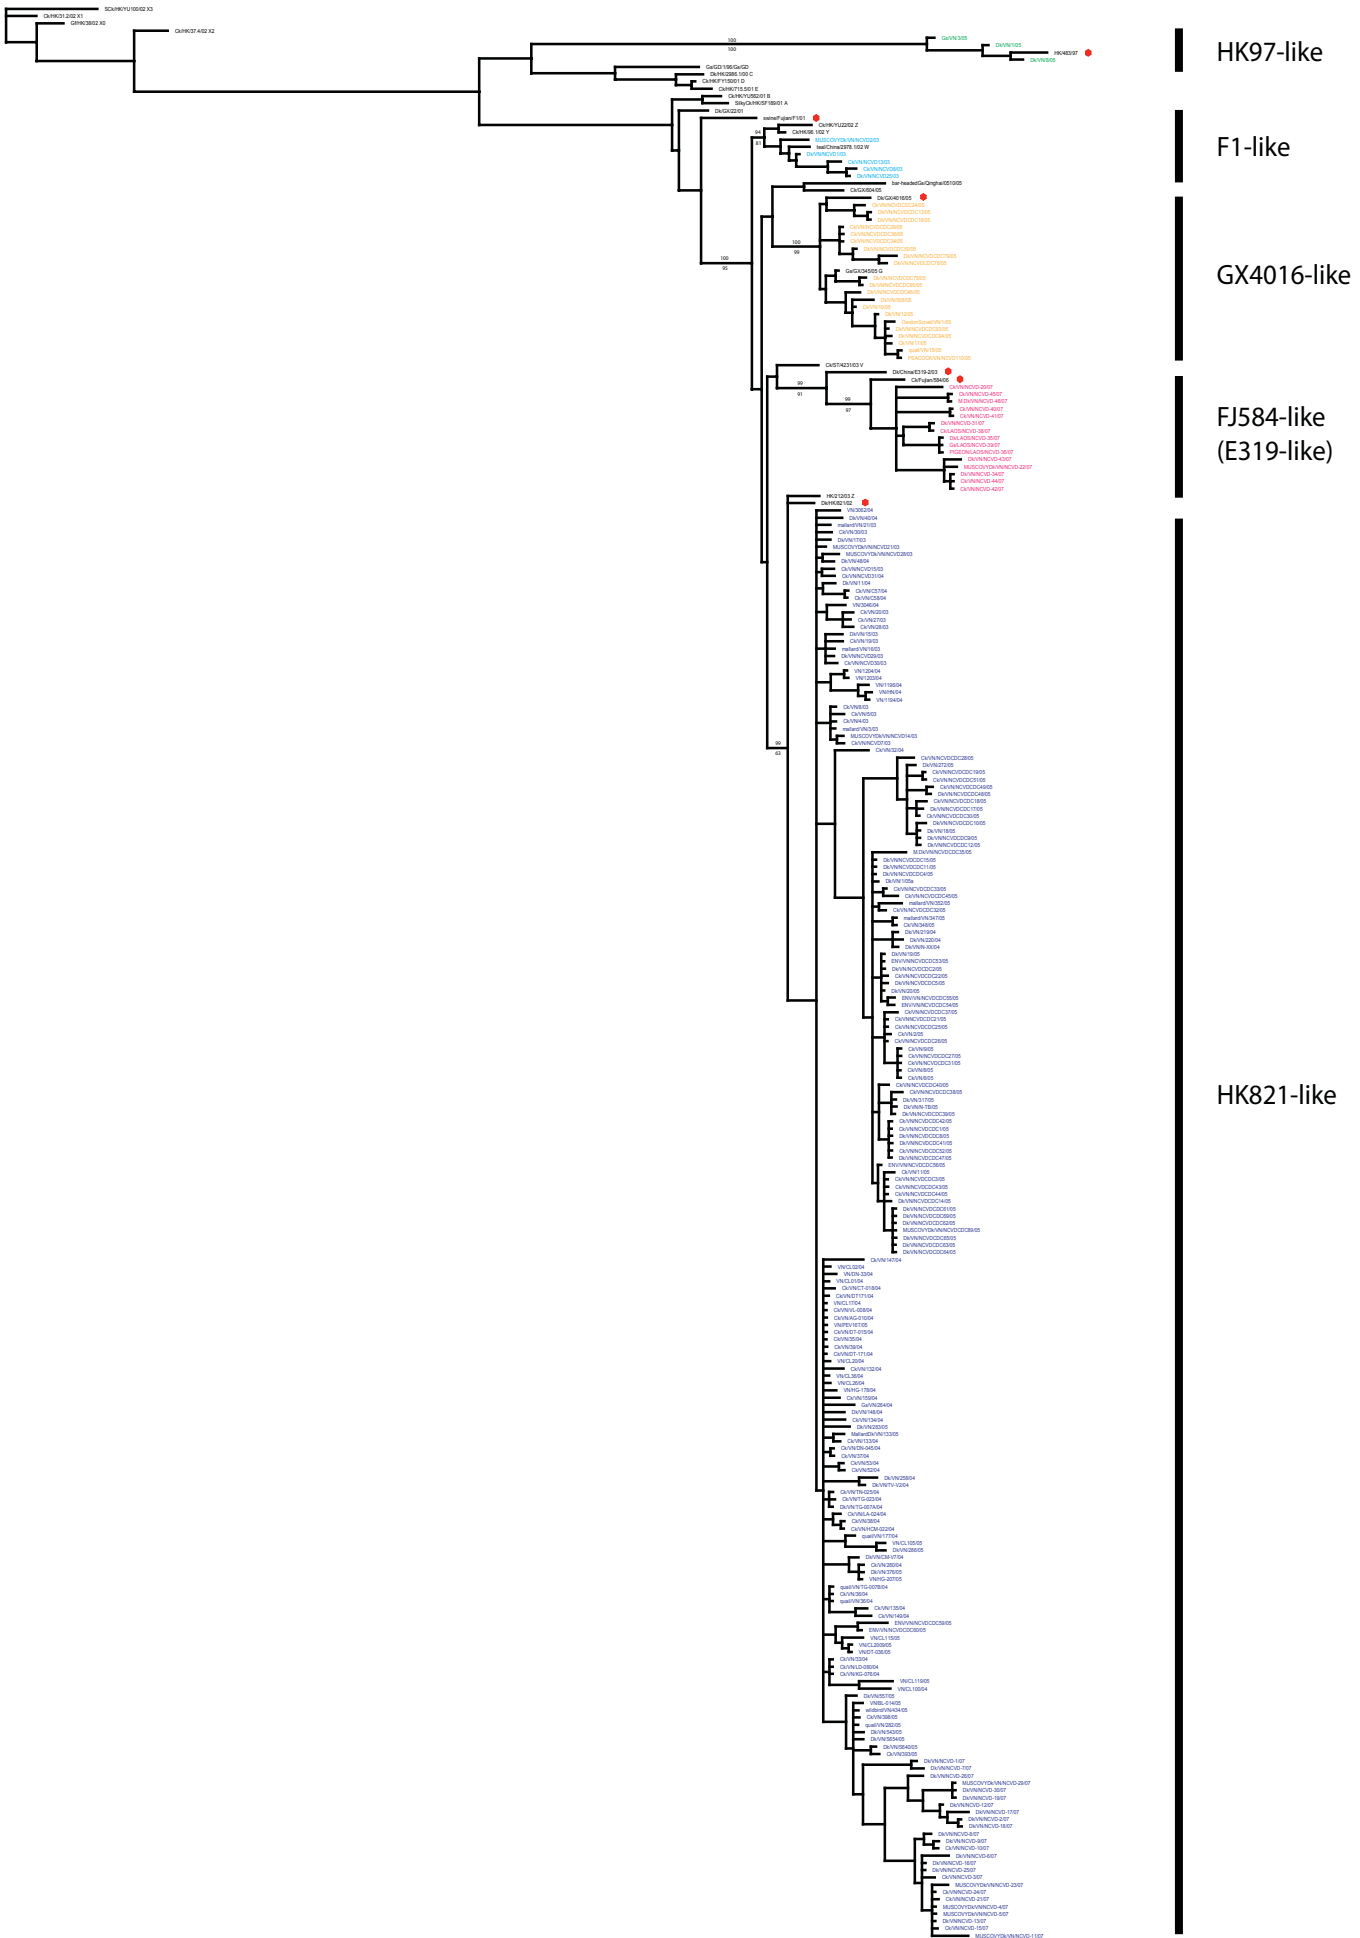

Figure S1E PA

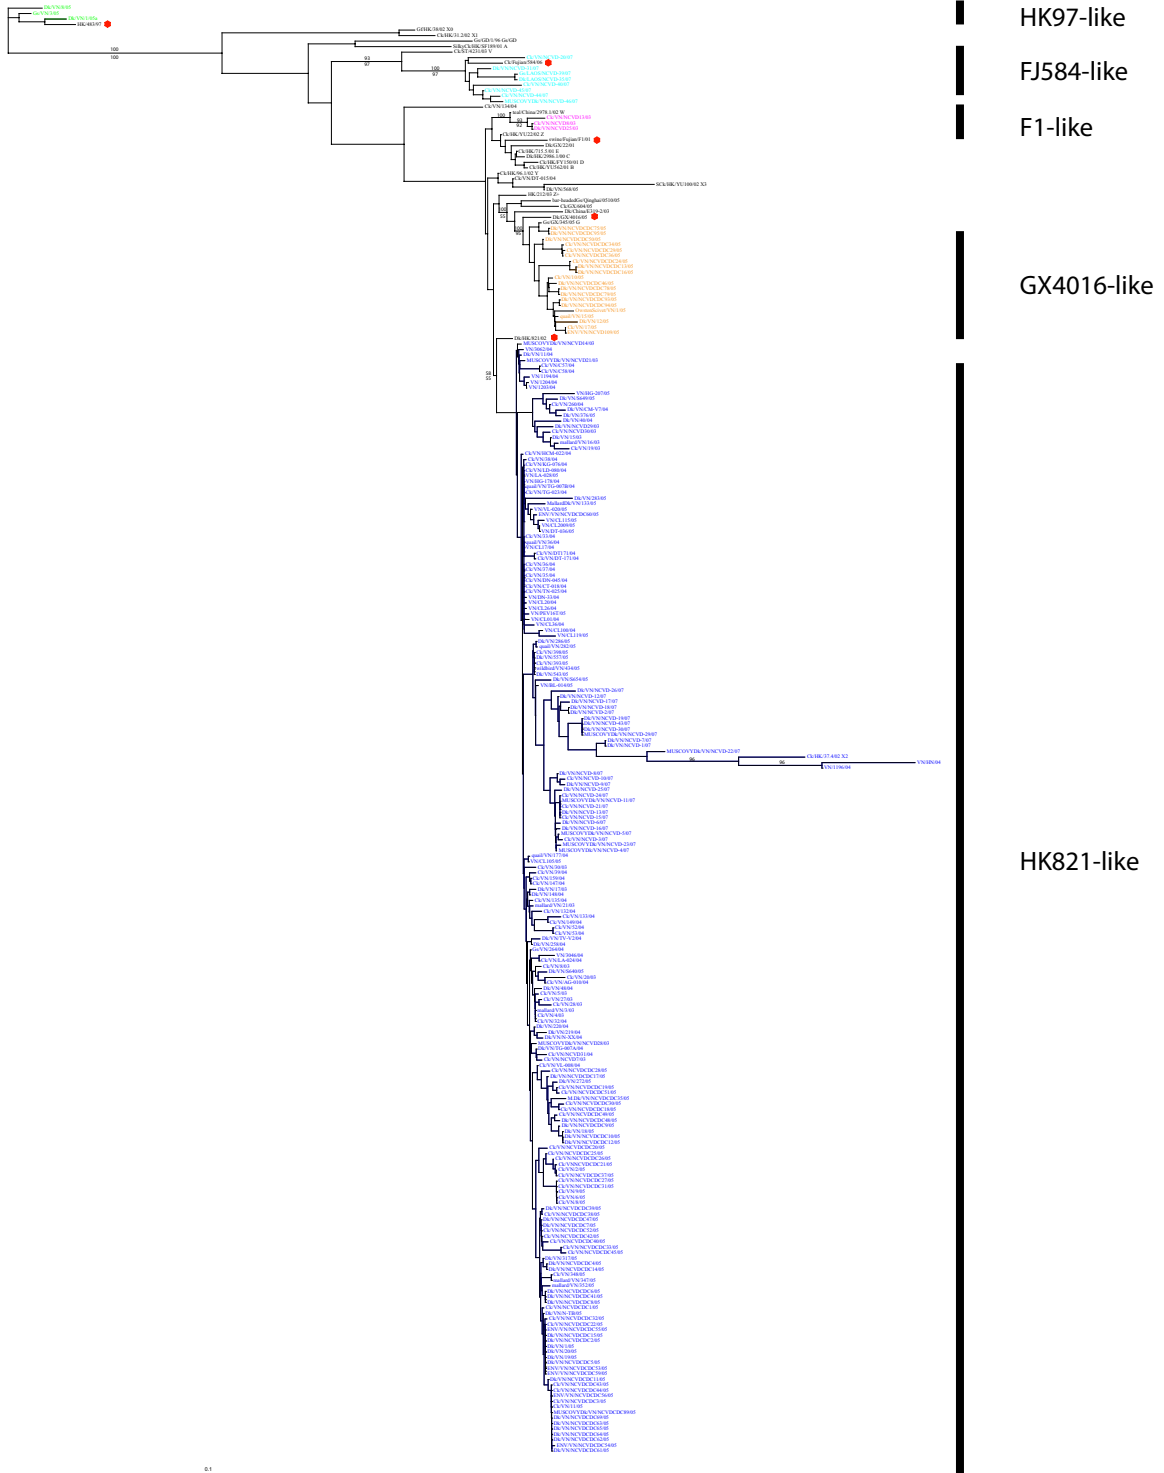

Figure S1F NP

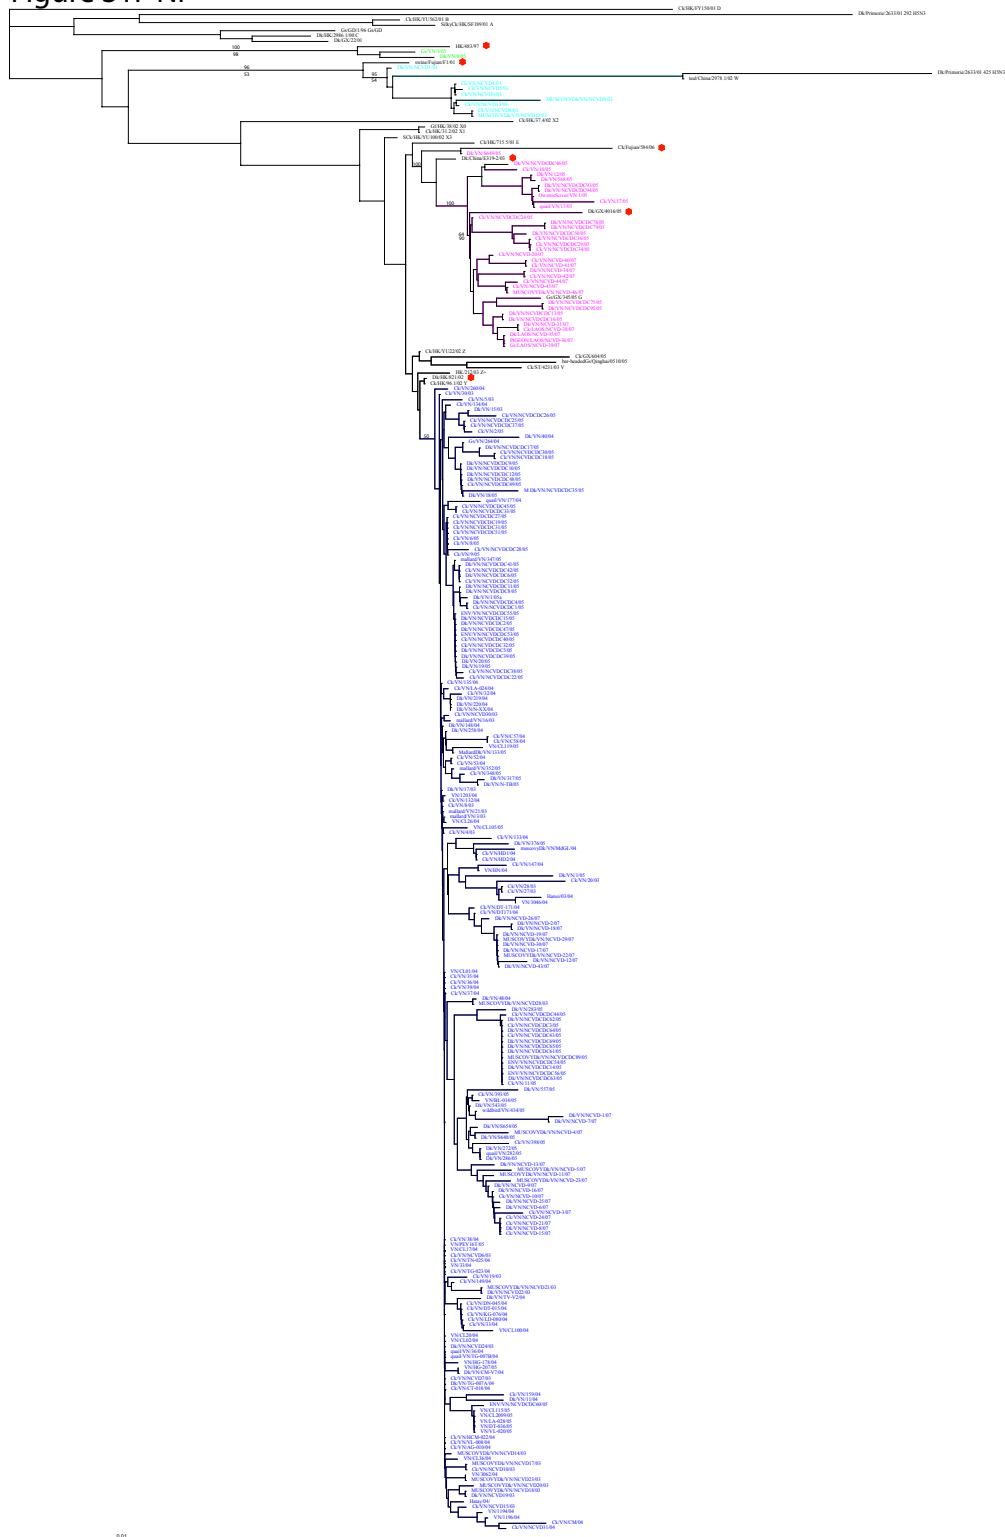

Figure S1G MP

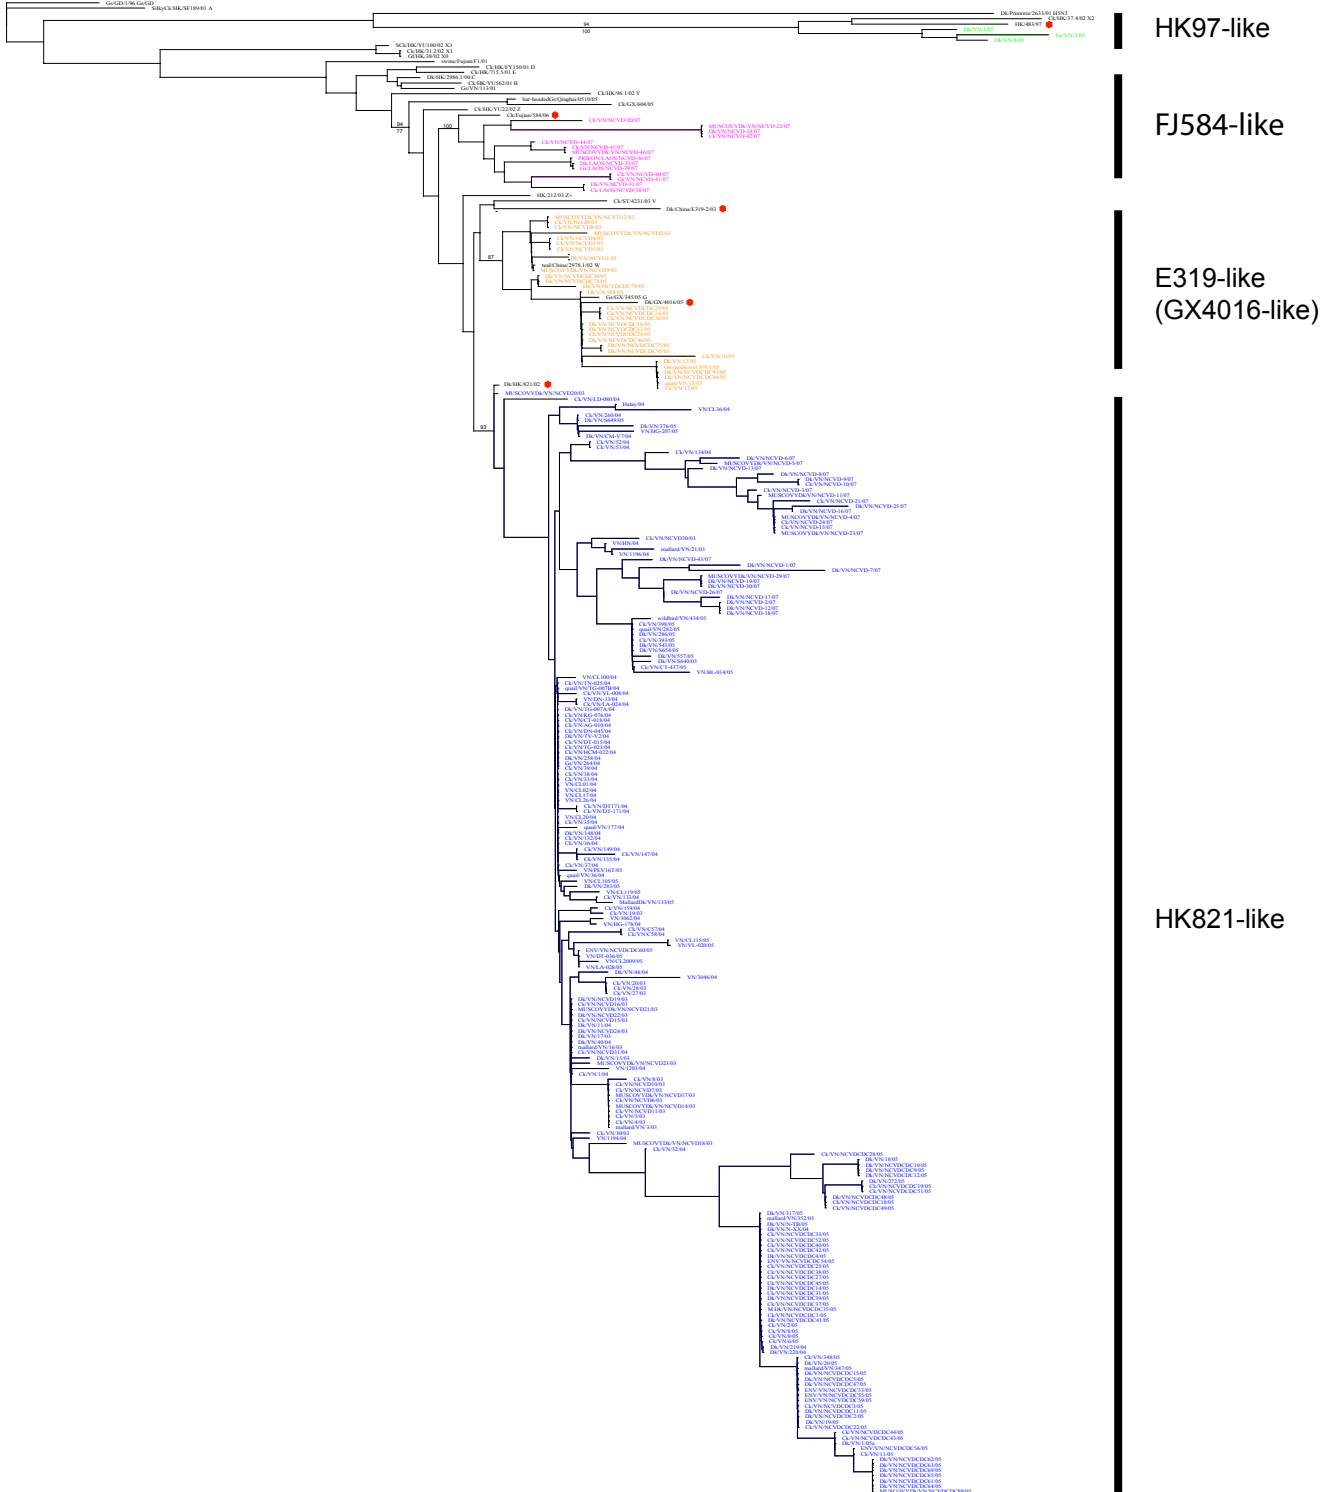

Figure S1H NS

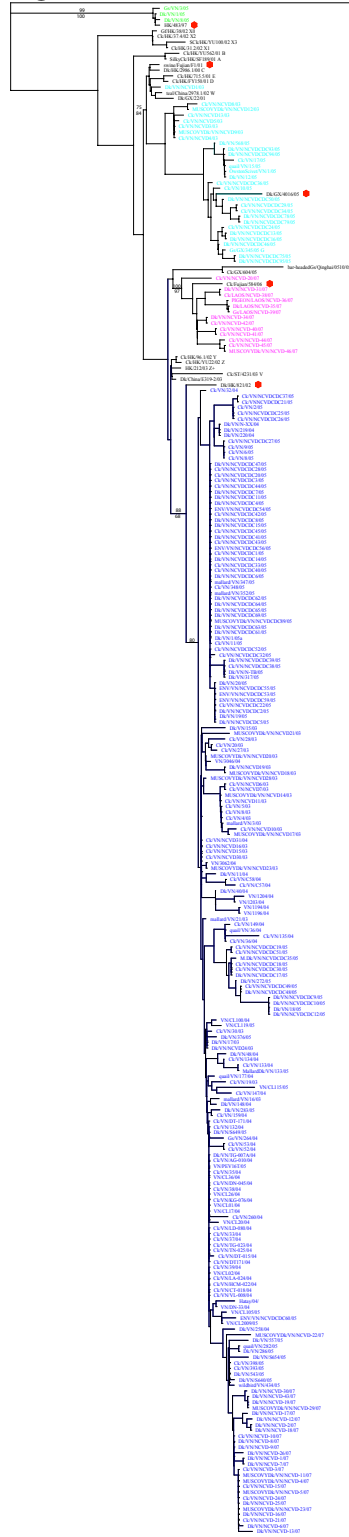

HK97-like

F1-like  
(GX4016-like)

FJ584-like

HK821-like
