# Supplementary material for: Evolution of Highly Pathogenic H5N1 Avian Influenza Viruses in Vietnam between 2001 and 2007
Source: PubMed Central journal article supplement (PMC2565130; doi:10.1371/journal.pone.0003462), 2008-10-21
Supplement: pone.0003462.s005.pdf [file pone.0003462.s005.pdf]

Figure S2

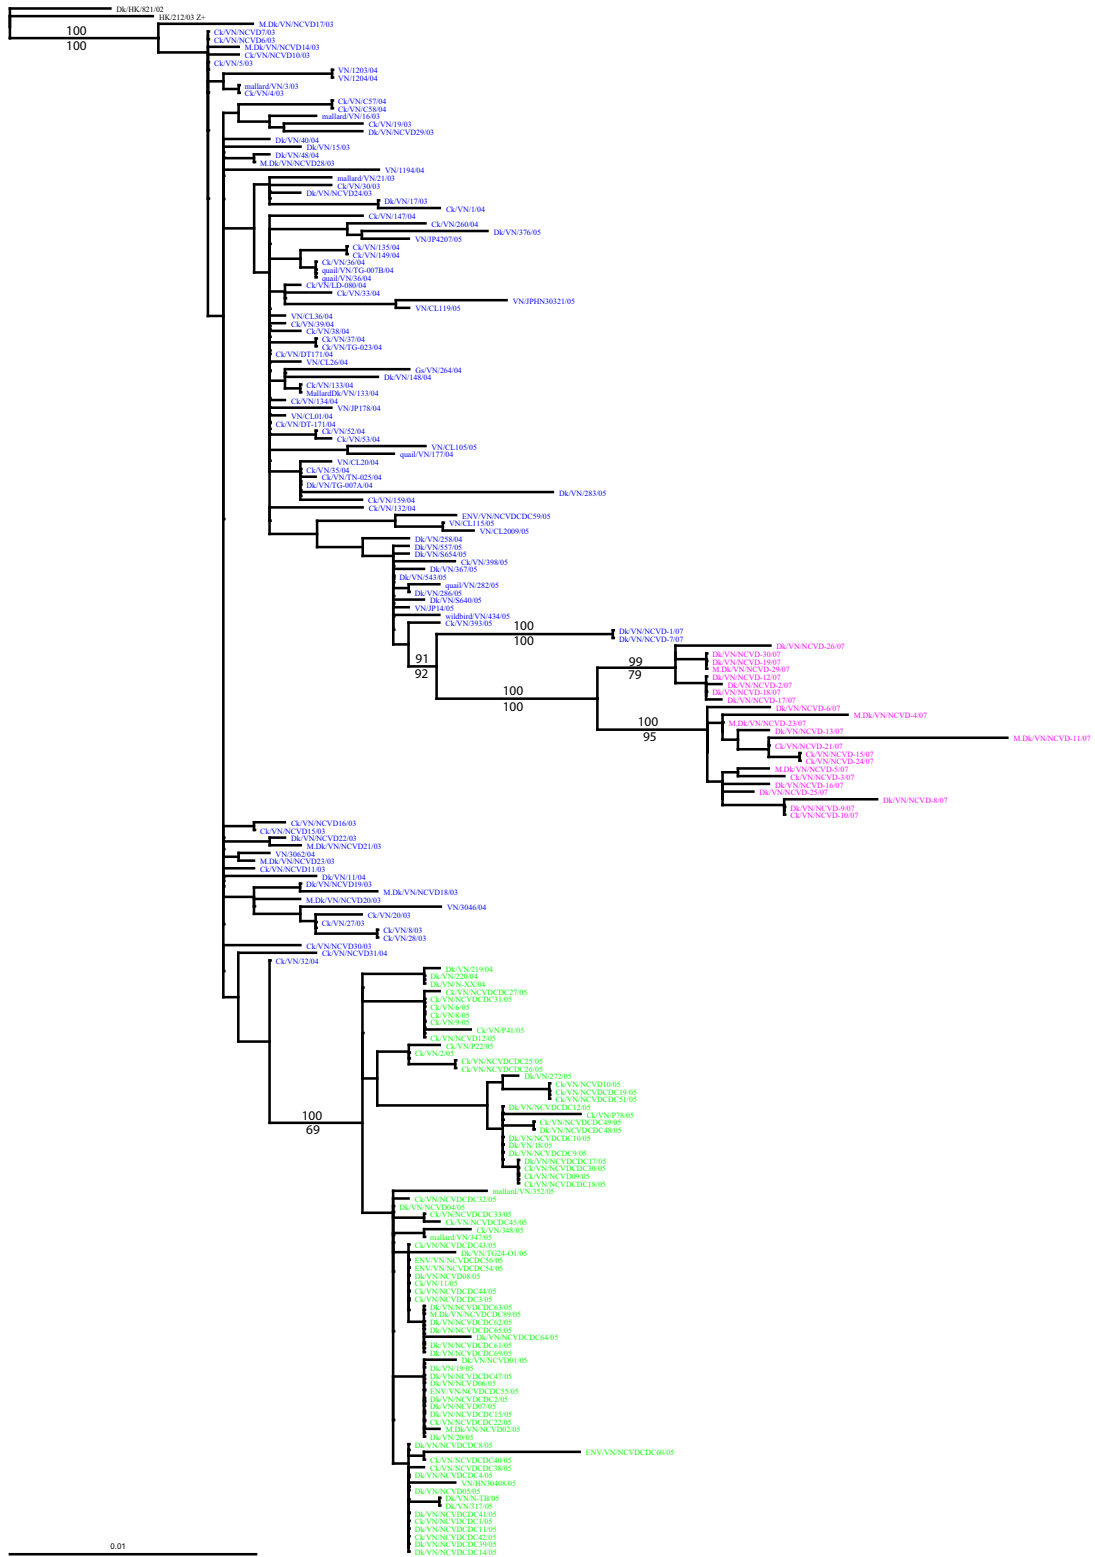

HK821P  
(2003-07)  
All Vietnam

HK821Beta  
(2007)  
Southern  
Vietnam

HK821Alpha  
(2005)  
Northern  
Vietnam
